# Supplementary material for: The Novel AT2 Receptor Agonist β-Pro7-AngIII Exerts Cardiac and Renal Anti-Fibrotic and Anti-Inflammatory Effects in High Salt-Fed Mice
Source: MDPI journal article supplement (doi:10.3390/ijms232214039), 2022-11-14
Supplement: s1 [file s1]

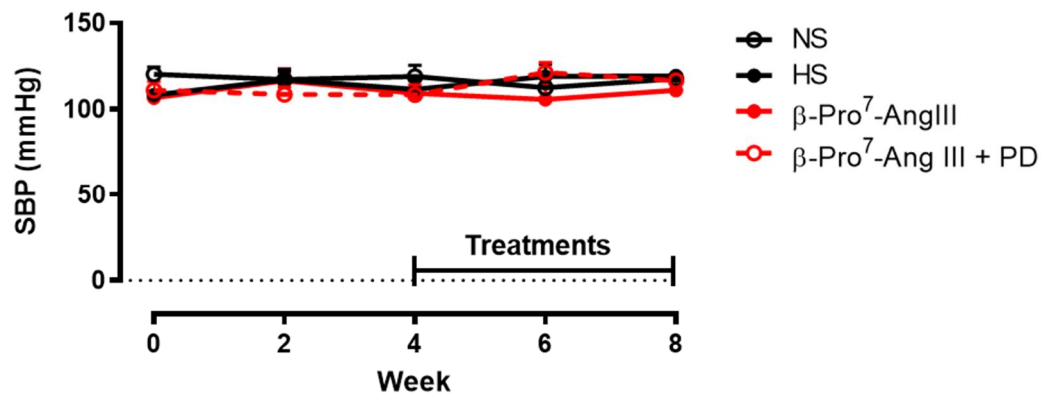

**Figure S1.** Effect of systolic blood pressure measured by tail cuff in male FVB/N mice fed a high salt (HS, 5% NaCl) diet for 8 weeks diet or mice fed on a high salt (HS, 5% NaCl) diet in the presence or absence of  $\beta$ -Pro<sup>7</sup>-AngIII (0.1 mg/kg/day) +/- PD123319 (1mg/kg/day). All treatments were given for 4 weeks, between weeks 5-8 of HS diet. At the same time, a group of mice were fed on a normal salt (NS, 0.5% NaCl) diet for comparison. All data are expressed as mean  $\pm$  s.e.m (n=6-8 per group).

**Table S1.** Primary and secondary antibodies for immunofluorescence staining.

| Primary antibody                   | Cat #                 | Conc <sup>n</sup> | Secondary antibody                    | Cat#                 | Conc <sup>n</sup> |
|------------------------------------|-----------------------|-------------------|---------------------------------------|----------------------|-------------------|
| $\alpha$ -SMA rabbit pAb           | Abcam (ab5694)        | 1:1000            | Alexa Fluor® 594 Goat Anti-Rabbit IgG | Invitrogen (A-11037) | 1:1000            |
| TGF- $\beta$ 1 rabbit pAb          | Abcam (ab92486)       | 1:500             | Alexa Fluor® 594 Goat Anti-Rabbit IgG | Invitrogen (A-11037) | 1:500             |
| p-I $\kappa$ B $\alpha$ rabbit mAb | Cell Sig (#28595)     | 1:200             | Alexa Fluor® 488 Goat Anti-Rabbit IgG | Invitrogen (A11008)  | 1:500             |
| F4/80 macrophage rat mAb           | Serotec (0505)        | 1:100             | Alexa Fluor® 488 Goat Anti-Rat IgG    | Invitrogen (A-11006) | 1:500             |
| MCP-1 rabbit pAb                   | Santa Cruz (sc-28879) | 1:1000            | Alexa Fluor® 488 Goat Anti-Rabbit IgG | Invitrogen (A11008)  | 1:500             |
